# Supplementary material for: An alternative design method for the double-layer combined die using autofrettage theory
Source: Copernicus journal article supplement (doi:10.5194/ms-8-267-2017), 2017-08-28
Supplement: Supplementary file 1 [file ms-8-267-2017-supplement.zip]

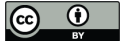

## *Supplement of*

# **An alternative design method for the double-layer combined die using autofrettage theory**

**Chengliang Hu et al.**

*Correspondence to:* Zhen Zhao (zzhao@sjtu.edu.cn)

- ms-8-267-2017-supplement-title-page.pdf
- FE model for the study.mud

The copyright of individual parts of the supplement might differ from the CC BY 3.0 License.
